# Supplementary material for: Conserved microbiota among young Heliconius butterfly species
Source: PeerJ journal article supplement (doi:10.7717/peerj.5502), 2018-10-02

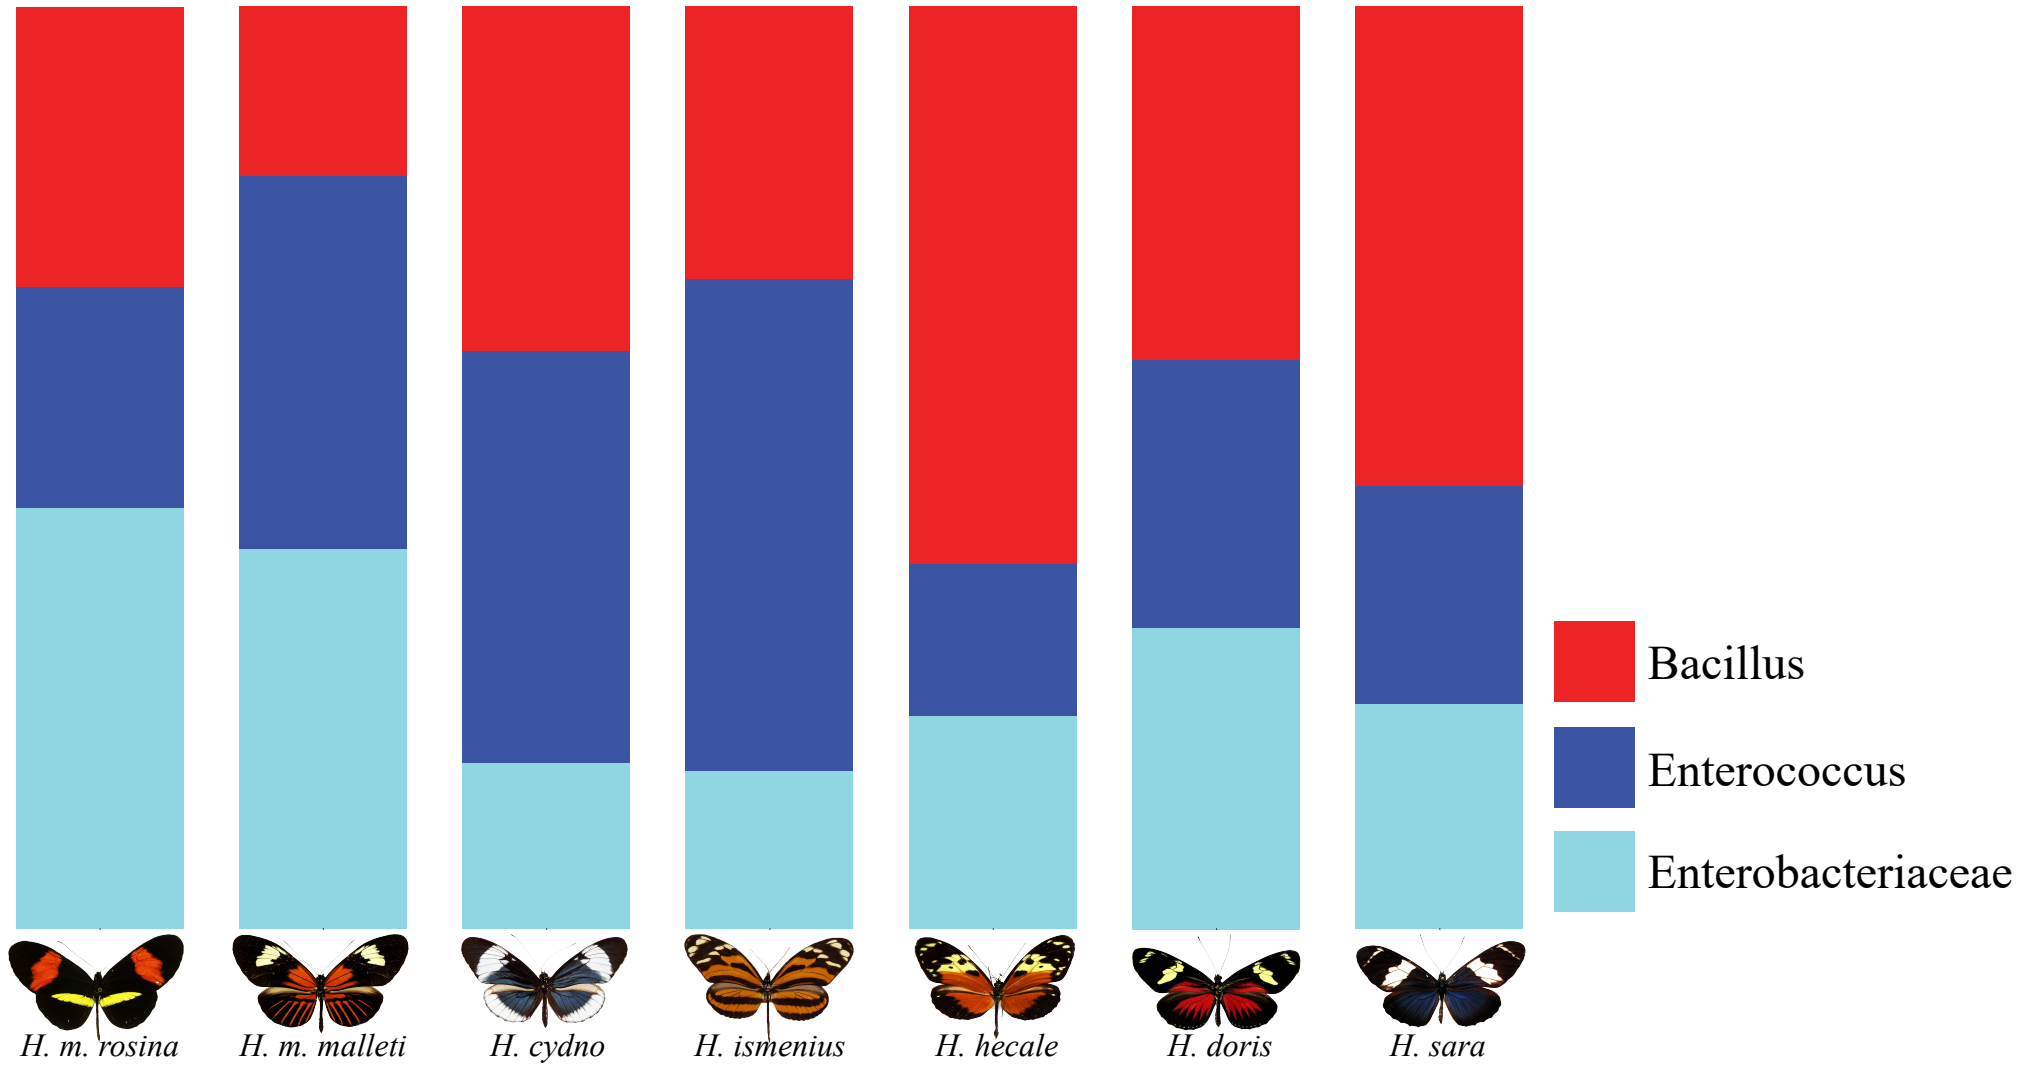

Supplement: Supplement_Figure_1_common_core.pdf [file Supplement_Figure_1_common_core.pdf]
